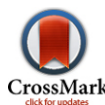

## Correction

# Correction: POPI (Pediatrics: Omission of Prescriptions and Inappropriate Prescriptions): Development of a Tool to Identify Inappropriate Prescribing

## The PLOS ONE Staff

There are errors in the legend for Figure 1, “Workflow for the validation of POPI.” The complete, correct legend for Figure 1 is:

\*An item involving codeine was removed subsequent to the validation of the propositions included in POPI, following the revelation of new contraindications for this drug in children under 12 years old [19]. Another item involving permethrin for lice was removed due to new recommendations to use dimeticone first instead of insecticides [20]. N: Number of items; n: number of panelists

## Reference

1. Prot-Labarthe S, Weil T, Angoulvant F, Boulkedid R, Alberti C, et al. (2014) POPI (Pediatrics: Omission of Prescriptions and Inappropriate Prescriptions): Development of a Tool to Identify Inappropriate Prescribing. PLoS ONE 9(6): e101171. doi:10.1371/journal.pone.0101171

**Citation:** The PLOS ONE Staff (2014) Correction: POPI (Pediatrics: Omission of Prescriptions and Inappropriate Prescriptions): Development of a Tool to Identify Inappropriate Prescribing. PLoS ONE 9(9): e108007. doi:10.1371/journal.pone.0108007

**Published:** September 16, 2014

**Copyright:** © 2014 The PLOS ONE Staff. This is an open-access article distributed under the terms of the Creative Commons Attribution License, which permits unrestricted use, distribution, and reproduction in any medium, provided the original author and source are credited.
